## P1415

**Obesity and epicardial fat in a Spanish infant population by echocardiography**

Aristizabal Duque CH.<sup>1</sup>; Fernandez Cabeza J.<sup>1</sup>; Blancas Sanchez IM.<sup>1</sup>; Ruiz Ortiz M.<sup>1</sup>; Delgado Ortega M.<sup>1</sup>; Rodriguez Almodovar A.<sup>1</sup>; Pan Alvarez Osorio M.<sup>1</sup>; Romo Pena E.<sup>1</sup>; Fonseca Del Pozo FJ.<sup>2</sup>; Romero Sardana M.<sup>3</sup>; Mesa Rubio D.<sup>3</sup>

<sup>1</sup>University Hospital Reina Sofia, Cordoba, Spain

<sup>2</sup>Hospital San Juan de Dios, cordoba, Spain

<sup>3</sup>Ayuntamiento de cordoba, cordoba, Spain

**Introduction:** Childhood obesity is currently a mayor public health problem. There is a direct relationship between a high body mass index with a higher cardiovascular morbimortality. Among child population 4 out of 10 individuals are overweight, the prevalence of overweight is 26 per cent and the prevalence of obesity is 12,6 per cent. The epicardial fat is a heart visceral adiposity index, may play a role in the coronary atherosclerosis pathogenesis, a chronic inflammatory disease and in heart disease. The rise in the epicardial fat is considered as a target organ injure in child population.

**Aims:** To know the relationship between childhood obesity and echocardiographic parameters of epicardial fat, as a target organ injure among the child Mediterranean population.

**Methods:** Randomly, we selected a sample of children and adolescents of primary and secondary education, in a rural town of 2864 inhabitants of southern Spain. We include children between 6-17 years. We performed transthoracic echocardiography, with measurements of 2D epicardial fat, in systole in parasternal long axis (PLA) and parasternal short axis (PSA), taking the measure as the average of 3 measurements in consecutive beats.

**Results:** We studied a total of 212 children ( $10.9 \pm 3.0$  years and 51.9% males), 45 (21.3% were obese), of which 7.2% were diagnosed with hypertension (HBP), 5.1% with metabolic syndrome and 5.3% as prediabetic. The thickness of the epicardial fat in PLA was related to Obesity  $2.2 \pm 0.7$  mm vs  $1.75 \pm 0.5$  mm p ( $<0.001$ ); HBP  $2.16 \pm 0.9$  mm vs  $1.86 \pm 0.5$  mm (P  $<0.05$ ); Metabolic syndrome  $2.23 \pm 0.8$  mm vs  $1.81 \pm 0.5$  mm (P  $<0.05$ ), in PSA: Obesity  $2.36 \pm 0.7$  mm vs  $1.78 \pm 0.6$  mm p ( $<0.001$ ); HBP  $2.31 \pm 0.6$  mm vs  $1.88 \pm 0.6$  mm (P  $<0.05$ ); Metabolic syndrome  $2.43 \pm 0.8$  mm vs  $1.87 \pm 0.6$  mm (P  $<0.01$ ) and overall combining PLA and PSA views: Obesity  $2.27 \pm 0.7$  mm vs  $1.76 \pm 0.5$  mm p ( $<0.001$ ); HBP  $2.23 \pm 0.7$  mm vs  $1.85 \pm 0.5$  mm (P  $<0.05$ ); Metabolic syndrome  $2.23 \pm 0.7$  mm vs  $1.84 \pm 0.5$  mm (P  $<0.01$ ).

**Conclusion:** In a random Spanish pediatric population correlation is found by echocardiography of the thickness of epicardial fat with obesity, HBP and metabolic syndrome. Being this a rapid test, non-invasive and without ionizing radiation.
